# Supplementary material for: Pancreatic Cancer Metastases Harbor Evidence of Polyclonality
Source: Oxford University Press journal article supplement (doi:10.1158/2159-8290.cd-15-0120), 2015-07-24
Supplement: 21598290cd150120-sup-144503_2_supp_0_nry6sc.pdf [file 21598290cd150120-sup-144503_2_supp_0_nry6sc.pdf]

## Supplemental Figures Legends

### Supplemental Figure S1: Characterization of the KPCX mouse model of pancreatic cancer

**A**, Recombination efficiency of the *Rosa<sup>Confetti</sup>* Cre-reporter system. The table depicts the percentage of total Dapi<sup>+</sup> cells expressing any one of 4 Confetti lineage labels. Data are presented as mean percentage  $\pm$  SEM. Data are pooled from n=4 CX mice with >16,000 Dapi<sup>+</sup> pancreatic cells counted per animal. The confetti allele was activated in CX on day 0 through oral gavage of the mother with TAM.

**B**, Fluorescent images of cultured RFP<sup>+</sup> tumor cells derived from KPCX mice. Cells imaged at passage 1 and 5 of culture (passages separated by 3 weeks) exhibit no evidence of Cre-independent color switching. Images are representative of n > 5000 observed cells in 5 replicates.

**C**, Age distribution (weeks) of age at detection of pancreatic tumors in *Pdx1-Cre; Kras<sup>G12D</sup>; p53<sup>fl/+</sup>; Rosa<sup>YFP</sup>* (“KPCY”) and KPCX mice. The mean age of tumor detection was 18.35 weeks in KPCY mice (■, n=35) and 16.12 weeks in KPCX mice (▼, n=29). ns, non-significant.

**D**, H&E images demonstrating histological similarities between KPCY- and KPCX-derived tumors. The KPCY image is taken from a paraffin section while the KPCX image is from a fixed frozen section.

Scale bars 50  $\mu$ m for **A** and **B** and 100  $\mu$ m for **D**.

### Supplemental Figure S2: Polyclonal cell clusters in peritoneal and diaphragm metastases are spaced widely apart

**A**, Fluorescent image of a peritoneal micro-metastasis. Insert shows a magnified view of the lesion.

**B**, Combined brightfield and fluorescent stereomicroscope image of two well-separated macroscopic metastases in a large section of peritoneal tissue.

**C**, Brightfield (left panel) and fluorescent (middle and right panel) stereomicroscope image of two well-separated macroscopic metastases in a large section of diaphragmatic tissue.

Scale bars 500  $\mu\text{m}$  for wide view in **A** (25  $\mu\text{m}$  for insert), 1 mm for **B**. In **C**, the scale bars in the left and middle panels are 1mm, and in the inserts they are 500  $\mu\text{m}$  (i) and 100  $\mu\text{m}$  (ii).

**Supplemental Figure S3: Derivation of 458d cells for assessing the origins of polyclonal metastases**

**A**, A RFP/YFP diaphragmatic metastasis was isolated and sorted into single RFP (458d\_R) and YFP (458d\_Y) cells and cultured for <4-6 passages. Cells were injected either intraperitoneally (IP) for studies of peritoneal metastasis or retro-orbitally (RO) for studies of lung metastasis as a mixture of single 458d\_R and 458d\_Y cells or as RFP/YFP clusters.

**B**, Fluorescent Image showing multi-color tumor cell clusters created by gentle mixing of equal numbers of 458d\_R and 458d\_Y cells for 8-12 h.

Scale bar 25 $\mu\text{m}$  (**B**).

**Supplemental Figure S4: Distribution of lung and liver metastases according to size**

**A** and **B**, Representative images from monochromatic lung (**A**) and liver (**B**) metastases.

Individual metastatic lesions were binned based on the number of cells per lesion: Single (1 cell), Nano (2-10 cells), Micro (11-100 cells), and Macro (>100 cells).

**C**, Percentage of total metastatic lesion in each size category pooled from n=6 (lung) and n=5 (liver) mice. Total number of lesions counted in lung and liver were 1512 and 763 respectively.

Scale bars 50  $\mu$ m for **A** and **B**.

**Supplemental Figure S5: Changes in clonal representation with growth of liver metastases**

**A**, Fluorescent images of bi-chromatic liver metastases showing a change in the ratio of lineage labeled populations during metastatic growth.

**B**, Curve showing the trend depicted in (A). The ratio of the number of cells in the minor fraction relative to the total number of fluorescent cells in a metastatic lesion (y-axis) is plotted as a function of the total fluorescent cell number in the lesion (x-axis). Each (●) represents a single liver metastasis. Data were taken from 33 individual liver metastases pooled from n=5 mice (lesions with identical ratios and size are represented as a single data point). Trend is significant with  $p < 0.0001$  by Wald Chi-square test.

Scale bars 25  $\mu$ m.

**Supplemental Figure S6: Lung metastatic burden following single and cluster injections**

**A**, Stereomicroscope brightfield (top panel) and fluorescent (bottom panel) images of lung metastasis 3 weeks following injection of equal number of cells (20,000) as either single cells (left panel) or as clusters (right panel).

**B**, Graph showing the trend depicted in (A). Data are taken from n=4 mice per group and presented as mean  $\pm$  SEM. \* $p < 0.001$  by Student's t test.

Scale bars 1 mm.
